# Supplementary material
Source: publisher figshare collection journal article supplement (https://frontiersin.figshare.com/ndownloader/files/15670259)
Supplement: Supplementary file 1 [file 15670259]

## Sheet: Bulk
IonCode	method	Culex	Aedes	Deinocerites	Toxorhynchites	Aedes_aegypti	Aedes_busckii	Aedes_taeniorhynchus	Anopheles_albimanus	Culex_bahamensis	Culex_bidens	Culex_bisulcatus	Culex_nigripalpus	Culex_pipiens_molestus	Culex_pipiens_pallens	Culex_quinquefasciatus	Culex_renatoi	Deinocerites_magnus
0101	morphological	0	1	0	0	1	0	0	0	0	0	0	0	0	0	0	0	0
0101	vsearch	0	1	0	0	1	0	0	0	0	0	0	0	0	0	1	0	0
0101	unoise	1	1	0	0	1	0	0	0	0	0	0	0	0	0	1	0	0
0102	morphological	1	1	0	0	1	0	0	0	0	0	0	0	0	0	1	0	0
0102	vsearch	1	1	0	0	1	0	0	0	0	0	0	0	0	0	1	0	0
0102	unoise	1	1	0	0	1	0	0	0	0	0	0	0	0	0	1	0	0
0103	morphological	1	1	0	0	1	0	0	0	0	0	0	0	0	0	1	0	0
0103	vsearch	1	1	0	0	1	0	0	0	1	0	0	0	0	0	1	0	0
0103	unoise	1	1	0	0	1	0	0	0	1	0	0	0	0	0	1	0	0
0104	morphological	1	1	0	0	1	0	0	0	0	0	0	0	0	0	1	0	0
0104	vsearch	1	1	0	0	1	0	0	0	0	0	0	0	0	0	1	0	0
0104	unoise	0	1	0	0	1	0	0	0	0	0	0	0	0	0	1	0	0
0105	morphological	1	1	0	0	1	0	0	0	0	0	0	0	0	0	1	0	0
0105	vsearch	0	0	0	0	0	0	0	0	0	0	0	0	0	0	1	0	0
0105	unoise	0	0	0	0	0	0	0	0	0	0	0	0	0	0	1	0	0
0106	morphological	0	0	0	0	0	0	0	0	0	0	0	0	0	0	0	0	0
0106	vsearch	0	0	0	0	0	0	0	0	0	0	0	0	0	0	1	0	0
0106	unoise	0	0	0	0	0	0	0	0	0	0	0	0	0	0	1	0	0
0107	morphological	0	0	0	0	0	0	0	0	0	0	0	0	0	0	0	0	0
0107	vsearch	0	0	0	0	0	0	0	0	0	0	0	0	0	0	1	0	0
0107	unoise	0	0	0	0	0	0	0	0	0	0	0	0	0	0	1	0	0
0108	morphological	1	0	0	0	0	0	0	0	0	0	1	0	0	0	0	0	0
0108	vsearch	0	0	0	0	0	0	0	0	0	0	0	0	0	0	0	0	0
0108	unoise	1	0	0	0	0	0	0	0	0	0	0	0	0	0	0	0	0
0109	morphological	0	1	0	0	1	0	0	0	0	0	0	0	0	0	0	0	0
0109	vsearch	0	1	0	0	1	0	0	0	0	0	0	0	0	0	1	0	0
0109	unoise	0	1	0	0	1	0	0	0	0	0	0	0	0	0	1	0	0
0110	morphological	1	1	0	0	1	0	0	0	0	0	0	0	0	0	1	0	0
0110	vsearch	1	1	0	0	1	0	0	0	0	0	0	0	0	1	1	0	0
0110	unoise	1	1	0	0	1	0	0	0	0	0	0	0	0	0	1	0	0
0111	morphological	0	1	1	0	1	0	0	0	0	0	0	0	0	0	0	0	1
0111	vsearch	0	1	0	0	1	0	0	0	1	0	0	0	0	0	1	0	0
0111	unoise	0	1	0	0	1	0	0	0	1	0	0	0	0	0	1	0	0
0112	morphological	1	0	0	0	0	0	0	0	1	0	0	0	0	0	1	0	0
0112	vsearch	1	0	0	0	0	0	0	0	1	0	0	0	0	0	1	0	0
0112	unoise	1	0	0	0	0	0	0	0	1	0	0	0	0	0	1	0	0
0113	morphological	1	0	0	0	0	0	0	0	0	0	1	0	0	0	0	0	0
0113	vsearch	0	0	0	0	0	0	0	0	0	0	0	0	0	0	0	0	0
0113	unoise	1	0	0	0	0	0	0	0	0	0	0	0	0	0	0	0	0
0114	morphological	0	0	0	0	0	0	0	0	0	0	0	0	0	0	0	0	0
0114	vsearch	0	0	0	0	0	0	0	0	0	0	0	0	0	0	0	0	0
0114	unoise	0	0	0	0	0	0	0	0	0	0	0	0	0	0	0	0	0
0115	morphological	0	0	0	0	0	0	0	0	0	0	0	0	0	0	0	0	0
0115	vsearch	0	0	0	0	0	0	0	0	0	0	0	0	0	0	1	0	0
0115	unoise	0	0	0	0	0	0	0	0	0	0	0	0	0	0	1	0	0
0116	morphological	0	0	0	0	0	0	0	0	0	0	0	0	0	0	0	0	0
0116	vsearch	1	0	0	0	0	0	0	0	0	0	0	0	0	0	0	0	0
0116	unoise	1	0	0	0	0	0	0	0	0	0	0	0	0	0	0	0	0
0117	morphological	0	1	0	0	1	0	0	0	0	0	0	0	0	0	0	0	0
0117	vsearch	0	1	0	0	1	0	0	0	0	0	0	0	0	0	0	0	0
0117	unoise	0	1	0	0	1	0	0	0	0	0	0	0	0	0	0	0	0
0118	morphological	1	0	0	0	0	0	0	0	1	0	0	0	0	0	1	0	0
0118	vsearch	1	0	0	0	0	0	0	0	1	0	0	0	0	0	1	0	0
0118	unoise	1	0	0	0	0	0	0	0	1	0	0	0	0	0	1	0	0
0119	morphological	0	1	1	0	1	0	0	0	0	0	0	0	0	0	0	0	1
0119	vsearch	1	1	1	0	1	0	0	0	1	0	0	0	0	0	0	0	1
0119	unoise	0	1	0	0	1	0	0	0	1	0	0	0	0	0	1	0	1
0120	morphological	0	0	1	0	0	0	0	0	0	0	0	0	0	0	0	0	1
0120	vsearch	0	0	1	0	0	0	0	0	0	0	0	0	0	0	1	0	1
0120	unoise	0	0	1	0	0	0	0	0	0	0	0	0	0	0	1	0	1
0121	morphological	1	0	0	0	0	0	0	0	0	0	0	0	0	0	1	0	0
0121	vsearch	0	0	0	0	0	0	0	0	0	0	0	0	0	0	1	0	0
0121	unoise	0	0	0	0	0	0	0	0	0	0	0	0	0	0	1	0	0
0122	morphological	0	0	0	0	0	0	0	0	0	0	0	0	0	0	0	0	0
0122	vsearch	0	0	0	0	0	0	0	0	1	0	0	0	0	0	1	0	0
0122	unoise	0	1	0	0	1	0	0	0	1	0	0	0	0	0	1	0	0
0123	morphological	1	0	0	0	0	0	0	0	0	0	1	0	0	0	0	0	0
0123	vsearch	0	1	0	0	0	1	0	0	0	0	0	0	0	0	0	0	0
0123	unoise	0	1	0	0	0	1	0	0	0	0	0	0	0	0	0	0	0
0124	morphological	0	0	0	0	0	0	0	0	0	0	0	0	0	0	0	0	0
0124	vsearch	1	0	0	0	0	0	0	0	0	0	0	0	0	0	0	0	0
0124	unoise	1	0	0	0	0	0	0	0	0	0	0	0	0	0	0	0	0
0125	morphological	0	1	0	0	1	0	0	0	0	0	0	0	0	0	0	0	0
0125	vsearch	0	1	0	0	1	0	0	0	1	0	0	0	0	0	1	0	1
0125	unoise	0	1	0	0	1	0	0	0	1	0	0	0	0	0	1	0	1
0126	morphological	1	0	0	0	0	0	0	0	1	0	0	0	0	0	0	0	0
0126	vsearch	0	0	0	0	0	0	0	0	0	0	0	0	0	0	0	0	0
0126	unoise	0	0	0	0	0	0	0	0	0	0	0	0	0	0	0	0	0
0127	morphological	1	0	0	0	0	0	0	0	0	0	0	0	0	0	1	0	0
0127	vsearch	0	1	0	0	1	0	0	0	1	0	0	0	0	0	1	0	0
0127	unoise	0	1	0	0	1	0	0	0	1	0	0	0	0	0	1	0	0
0128	morphological	1	0	0	0	0	0	0	1	0	0	0	1	0	0	0	0	0
0128	vsearch	0	0	0	0	0	0	0	0	0	0	0	1	0	0	0	0	0
0128	unoise	0	0	0	0	0	0	0	0	0	0	0	1	0	0	0	0	0
0129	morphological	0	1	0	0	1	0	0	0	0	0	0	0	0	0	0	0	0
0129	vsearch	0	1	0	0	1	0	0	0	0	0	0	0	0	0	0	0	0
0129	unoise	0	1	0	0	1	0	0	0	0	0	0	0	0	0	0	0	0
0130	morphological	0	0	0	0	0	0	0	0	0	0	0	0	0	0	0	0	0
0130	vsearch	0	1	0	0	1	0	0	0	1	0	0	0	0	0	1	0	0
0130	unoise	1	1	0	0	1	0	0	0	1	0	0	0	0	0	1	0	0
0131	morphological	1	0	0	0	0	0	0	0	0	0	1	0	0	0	0	0	0
0131	vsearch	0	0	0	0	0	0	0	0	0	0	0	0	0	0	0	0	0
0131	unoise	1	0	0	0	0	0	0	0	0	0	0	0	0	0	0	0	0
0132	morphological	0	0	0	0	0	0	0	0	0	0	0	0	0	0	0	0	0
0132	vsearch	1	0	0	0	0	0	0	0	0	0	0	0	0	0	0	0	0
0132	unoise	1	0	0	0	0	0	0	0	0	0	0	0	0	0	0	0	0
0133	morphological	0	0	0	0	0	0	0	0	0	0	0	0	0	0	0	0	0
0133	vsearch	0	0	0	0	0	0	0	0	0	0	0	0	0	0	0	0	0
0133	unoise	0	0	0	0	0	0	0	0	0	0	0	0	0	0	0	0	0
0134	morphological	0	1	0	0	1	0	0	0	0	0	0	0	0	0	0	0	0
0134	vsearch	0	1	0	0	1	0	0	0	1	0	0	0	0	0	0	0	0
0134	unoise	0	1	0	0	1	0	0	0	1	0	0	0	0	0	0	0	0
0135	morphological	0	0	1	0	0	0	0	0	0	0	0	0	0	0	0	0	1
0135	vsearch	1	1	0	0	1	0	0	0	1	0	0	1	0	0	1	0	1
0135	unoise	0	1	0	0	1	0	0	0	1	0	0	1	0	0	1	0	1
0136	morphological	1	1	0	0	1	0	0	0	0	0	0	0	0	0	1	0	0
0136	vsearch	0	0	0	0	0	0	0	0	0	0	0	0	0	0	1	0	0
0136	unoise	0	0	0	0	0	0	0	0	0	0	0	0	0	0	1	0	0
0137	morphological	0	1	0	0	1	0	0	0	0	0	0	0	0	0	0	0	0
0137	vsearch	0	1	0	0	1	0	0	0	0	0	0	0	0	0	0	0	0
0137	unoise	0	1	0	0	1	0	0	0	0	0	0	0	0	0	0	0	0
0138	morphological	1	0	0	0	0	0	0	0	0	0	0	0	0	0	1	0	0
0138	vsearch	0	0	0	0	0	0	0	0	0	0	0	0	0	0	1	0	0
0138	unoise	0	0	0	0	0	0	0	0	0	0	0	0	0	0	1	0	0
0139	morphological	0	1	0	0	0	1	0	0	0	0	0	0	0	0	0	0	0
0139	vsearch	0	0	0	0	0	1	0	0	0	0	0	0	0	0	0	0	0
0139	unoise	0	0	0	0	0	1	0	0	0	0	0	0	0	0	0	0	0
0140	morphological	0	0	0	0	0	0	0	0	0	0	0	0	0	0	0	0	0
0140	vsearch	1	0	0	0	0	0	0	0	0	0	0	0	0	0	0	0	0
0140	unoise	1	0	0	0	0	0	0	0	0	0	0	0	0	0	0	0	0
0141	morphological	0	1	0	0	1	0	0	0	0	0	0	0	0	0	0	0	0
0141	vsearch	0	1	0	0	1	0	0	0	0	0	0	0	0	0	1	0	0
0141	unoise	0	1	0	0	1	0	0	0	0	0	0	0	0	0	1	0	0
0142	morphological	1	1	0	0	1	0	0	0	0	0	0	0	0	0	1	0	0
0142	vsearch	0	0	0	0	0	0	0	0	0	0	0	0	0	0	1	0	0
0142	unoise	0	0	0	0	0	0	0	0	0	0	0	0	0	0	1	0	0
0143	morphological	0	0	1	0	0	0	0	0	0	0	0	0	0	0	0	0	1
0143	vsearch	0	0	1	0	0	0	0	0	1	0	0	0	0	0	1	0	1
0143	unoise	0	0	1	0	0	0	0	0	1	0	0	0	0	0	1	0	1
0144	morphological	1	1	0	0	1	0	0	0	1	0	0	0	0	0	0	0	0
0144	vsearch	0	1	0	0	1	0	0	0	1	0	0	0	0	0	0	0	0
0144	unoise	0	1	0	0	1	0	0	0	1	0	0	0	0	0	0	0	0
0145	morphological	0	1	0	0	1	0	0	0	0	0	0	0	0	0	0	0	0
0145	vsearch	0	1	0	0	1	0	0	0	0	0	0	0	0	0	0	0	0
0145	unoise	0	1	0	0	1	0	0	0	0	0	0	0	0	0	0	0	0
0146	morphological	1	1	0	0	1	0	0	0	0	0	0	0	0	0	1	0	0
0146	vsearch	0	1	0	0	1	0	0	0	0	0	0	0	0	0	1	0	0
0146	unoise	0	1	0	0	1	0	0	0	0	0	0	0	0	0	1	0	0
0147	morphological	1	0	0	0	0	0	0	0	0	0	1	0	0	0	0	0	0
0147	vsearch	0	0	0	0	0	0	0	0	0	0	0	0	0	0	0	0	0
0147	unoise	1	0	0	0	0	0	0	0	0	0	0	0	0	0	0	0	0
0148	morphological	0	0	0	0	0	0	0	0	0	0	0	0	0	0	0	0	0
0148	vsearch	0	0	0	0	0	0	0	0	0	0	0	0	0	0	0	0	0
0148	unoise	0	0	0	0	0	0	0	0	0	0	0	0	0	0	0	0	0
0149	morphological	1	1	0	0	1	0	0	0	0	0	0	0	0	0	1	0	0
0149	vsearch	1	1	0	0	1	0	0	0	0	0	0	0	1	0	1	0	0
0149	unoise	0	1	0	0	1	0	0	0	1	0	0	0	0	0	1	0	0
0150	morphological	1	0	0	0	0	0	0	0	0	0	0	0	0	0	1	0	0
0150	vsearch	0	1	0	0	1	0	0	0	0	0	0	0	0	0	1	0	0
0150	unoise	0	1	0	0	1	0	0	0	0	0	0	0	0	0	1	0	0
0151	morphological	0	1	0	0	1	0	0	0	0	0	0	0	0	0	0	0	0
0151	vsearch	0	0	1	0	0	0	0	0	0	0	0	0	0	0	1	0	1
0151	unoise	0	0	1	0	0	0	0	0	0	0	0	0	0	0	1	0	1
0152	morphological	1	0	0	0	0	0	0	0	0	0	0	0	0	0	1	0	0
0152	vsearch	0	0	0	0	0	0	0	0	0	0	0	0	0	0	1	0	0
0152	unoise	0	0	0	0	0	0	0	0	0	0	0	0	0	0	1	0	0
0153	morphological	0	1	0	0	0	1	0	0	0	0	0	0	0	0	0	0	0
0153	vsearch	0	0	0	0	0	0	0	0	0	0	0	0	0	0	1	0	0
0153	unoise	0	0	0	0	0	0	0	0	0	0	0	0	0	0	1	0	0
0154	morphological	0	0	0	0	0	0	0	0	0	0	0	0	0	0	0	0	0
0154	vsearch	0	0	0	0	0	0	0	0	0	0	0	0	0	0	1	0	0
0154	unoise	0	0	0	0	0	0	0	0	0	0	0	0	0	0	1	0	0
0155	morphological	1	0	0	0	0	0	0	0	0	0	0	0	0	0	1	0	0
0155	vsearch	0	0	0	0	0	0	0	0	0	0	0	0	0	0	1	0	0
0155	unoise	0	0	0	0	0	0	0	0	0	0	0	0	0	0	1	0	0
0156	morphological	1	0	0	0	0	0	0	0	0	0	1	0	0	0	0	0	0
0156	vsearch	0	0	0	0	0	0	0	0	0	0	0	0	0	0	0	0	0
0156	unoise	1	0	0	0	0	0	0	0	0	0	0	0	0	0	0	0	0
0157	morphological	1	1	0	0	1	0	0	0	0	0	0	0	0	0	1	0	0
0157	vsearch	1	1	0	0	1	0	0	0	0	0	0	0	0	0	1	0	0
0157	unoise	1	1	0	0	1	0	0	0	0	0	0	0	0	0	1	0	0
0158	morphological	1	0	0	0	0	0	0	0	0	0	0	0	0	0	1	0	0
0158	vsearch	0	0	0	0	0	0	0	0	0	0	0	0	0	0	1	0	0
0158	unoise	0	0	0	0	0	0	0	0	0	0	0	0	0	0	1	0	0
0159	morphological	0	1	0	0	1	0	0	0	0	0	0	0	0	0	0	0	0
0159	vsearch	1	1	0	0	1	0	0	0	0	0	0	0	0	0	1	0	1
0159	unoise	1	1	0	0	1	0	0	0	0	0	0	0	0	0	1	0	1
0160	morphological	1	0	0	0	0	0	0	0	0	0	0	0	0	0	1	0	0
0160	vsearch	0	0	0	0	0	0	0	0	0	0	0	0	0	0	1	0	0
0160	unoise	0	0	0	0	0	0	0	0	0	0	0	0	0	0	1	0	0
0161	morphological	1	0	0	0	0	0	0	0	0	0	0	0	0	0	1	0	0
0161	vsearch	0	0	0	0	0	0	0	0	0	0	0	0	0	0	1	0	0
0161	unoise	0	0	0	0	0	0	0	0	0	0	0	0	0	0	1	0	0
0162	morphological	1	0	0	0	0	0	0	0	0	0	0	0	0	0	1	0	0
0162	morphological	0	1	0	0	1	0	0	0	0	0	0	0	0	0	0	0	0
0162	vsearch	0	0	0	0	0	0	0	0	0	0	0	0	0	0	1	0	0
0162	unoise	0	0	0	0	0	0	0	0	0	0	0	0	0	0	1	0	0
0163	morphological	1	0	0	0	0	0	0	0	0	0	1	0	0	0	0	0	0
0163	vsearch	1	0	0	0	0	0	0	0	0	0	0	0	0	0	0	0	0
0163	unoise	1	0	0	0	0	0	0	0	0	0	0	0	0	0	0	0	0
0164	morphological	1	0	0	0	0	0	0	0	0	0	1	0	0	0	0	0	0
0164	vsearch	0	0	0	0	0	0	0	0	0	0	0	0	0	0	0	0	0
0164	unoise	0	0	0	0	0	0	0	0	0	0	0	0	0	0	0	0	0
0165	morphological	1	1	0	0	1	0	0	0	0	0	0	0	0	0	1	0	0
0165	vsearch	1	1	0	0	1	0	0	0	0	0	0	0	0	0	1	0	0
0165	unoise	0	1	0	0	1	0	0	0	0	0	0	0	0	0	1	0	0
0166	morphological	1	0	0	0	0	0	0	0	0	0	0	0	0	0	1	0	0
0166	vsearch	1	1	0	0	1	0	0	0	0	0	0	0	0	0	1	0	0
0166	unoise	1	1	0	0	1	0	0	0	0	0	0	0	0	0	1	0	0
0167	morphological	1	0	0	0	0	0	0	0	1	0	0	0	0	0	1	0	0
0167	vsearch	0	1	0	0	1	0	0	0	0	0	0	0	0	0	1	0	0
0167	unoise	0	1	0	0	1	0	0	0	0	0	0	0	0	0	1	0	0
0168	morphological	1	0	0	0	0	0	0	0	0	0	0	0	0	0	1	0	0
0168	vsearch	0	0	0	0	0	0	0	0	0	0	0	0	0	0	1	0	0
0168	unoise	0	0	0	0	0	0	0	0	0	0	0	0	0	0	1	0	0
0169	morphological	0	1	0	0	0	1	0	0	0	0	0	0	0	0	0	0	0
0169	vsearch	0	0	0	0	0	0	0	0	0	0	0	0	0	0	1	0	0
0169	unoise	0	0	0	0	0	0	0	0	0	0	0	0	0	0	1	0	0
0170	morphological	0	0	0	0	0	0	0	0	0	0	0	0	0	0	0	0	0
0171	morphological	0	0	0	1	0	0	0	0	0	0	0	0	0	0	0	0	0
0171	vsearch	0	0	0	0	0	0	0	0	0	0	0	0	0	0	0	0	0
0171	unoise	0	0	0	1	0	0	0	0	0	0	0	0	0	0	0	0	0
0172	morphological	1	0	0	0	0	0	0	0	0	0	1	0	0	0	0	0	0
0172	vsearch	0	0	0	0	0	0	0	0	0	0	0	0	0	0	0	0	0
0172	unoise	1	0	0	0	0	0	0	0	0	0	0	0	0	0	0	0	0
0173	morphological	0	1	0	0	1	0	0	0	0	0	0	0	0	0	0	0	0
0173	vsearch	1	1	0	0	1	0	0	0	0	0	0	0	0	0	1	0	0
0173	unoise	0	1	0	0	1	0	0	0	0	0	0	0	0	0	1	0	0
0174	morphological	1	0	0	0	0	0	0	0	0	0	0	0	0	0	1	0	0
0174	vsearch	0	0	0	0	0	0	0	0	0	0	0	1	0	0	0	0	0
0174	unoise	0	0	0	0	0	0	0	0	0	0	0	1	0	0	0	0	0
0175	morphological	1	0	0	0	0	0	0	0	0	0	0	1	0	0	1	0	0
0175	vsearch	1	1	0	0	1	0	0	0	0	0	0	1	0	0	0	0	0
0175	unoise	0	1	0	0	1	0	0	0	0	0	0	1	0	0	0	0	0
0176	morphological	1	1	0	0	1	0	0	0	0	0	0	0	0	0	1	0	0
0176	vsearch	0	0	0	0	0	0	0	0	0	0	0	0	0	0	1	0	0
0176	unoise	0	0	0	0	0	0	0	0	0	0	0	0	0	0	1	0	0
0177	morphological	1	1	0	0	1	0	0	0	0	0	0	0	0	0	1	0	0
0177	vsearch	0	1	0	0	1	0	0	0	0	0	0	0	0	0	1	0	0
0177	unoise	0	1	0	0	1	0	0	0	0	0	0	0	0	0	1	0	0
0178	morphological	0	0	0	0	0	0	0	0	0	0	0	0	0	0	0	0	0
0178	vsearch	0	0	0	0	0	0	0	0	0	0	0	0	0	0	1	0	0
0178	unoise	0	0	0	0	0	0	0	0	0	0	0	0	0	0	1	0	0
0179	morphological	1	0	0	0	0	0	0	0	0	0	0	0	0	0	1	0	0
0179	vsearch	0	0	0	0	0	0	0	0	0	0	0	0	0	0	0	0	0
0179	unoise	1	0	0	0	0	0	0	0	0	0	0	0	0	0	0	0	0
0180	morphological	1	0	0	0	0	0	0	0	0	0	1	0	0	0	0	0	0
0180	vsearch	0	0	0	0	0	0	0	0	0	0	0	0	0	0	0	0	0
0180	unoise	1	0	0	0	0	0	0	0	0	0	0	0	0	0	0	0	0
0181	morphological	0	1	0	0	1	0	0	0	0	0	0	0	0	0	0	0	0
0181	vsearch	0	1	0	0	1	0	0	0	0	0	0	0	0	0	0	0	0
0181	unoise	0	1	0	0	1	0	0	0	0	0	0	0	0	0	0	0	0
0182	morphological	1	1	0	0	1	0	0	0	0	0	0	0	0	0	1	0	0
0182	vsearch	0	0	0	0	0	0	0	0	0	0	0	0	0	0	1	0	0
0182	unoise	0	0	0	0	0	0	0	0	0	0	0	0	0	0	1	0	0
0183	morphological	1	0	0	0	0	0	0	0	1	0	0	0	0	0	0	0	0
0183	vsearch	1	0	0	0	0	0	0	0	1	0	0	0	0	0	0	0	0
0183	unoise	1	0	0	0	0	0	0	0	1	0	0	0	0	0	0	0	0
0184	morphological	0	1	0	0	0	0	1	1	0	0	0	0	0	0	0	0	0
0184	vsearch	0	0	0	0	0	0	1	1	0	0	0	0	0	0	1	0	0
0184	unoise	0	0	0	0	0	0	1	1	0	0	0	0	0	0	1	0	0
0185	morphological	0	0	0	0	0	0	0	0	0	0	0	0	0	0	0	0	0
0185	vsearch	0	0	0	0	0	0	0	0	0	0	0	0	0	0	0	0	0
0185	unoise	0	0	0	0	0	0	0	0	0	0	0	0	0	0	0	0	0
0186	morphological	0	0	0	0	0	0	0	0	0	0	0	0	0	0	0	0	0
0186	vsearch	0	0	0	0	0	0	0	0	1	0	0	0	0	0	0	0	0
0186	unoise	0	0	0	0	0	0	0	0	1	0	0	0	0	0	0	0	0
0187	morphological	1	0	0	0	0	0	0	0	0	0	1	0	0	0	0	0	0
0187	vsearch	1	0	0	0	0	0	0	0	0	0	0	0	0	0	0	0	0
0187	unoise	1	0	0	0	0	0	0	0	0	0	0	0	0	0	0	0	0
0188	morphological	0	0	0	0	0	0	0	0	0	0	0	0	0	0	0	0	0
0188	vsearch	0	0	0	0	0	0	0	0	0	0	0	0	0	0	0	0	0
0188	unoise	1	0	0	0	0	0	0	0	0	0	0	0	0	0	0	0	0
0189	morphological	0	1	0	0	1	0	0	0	0	0	0	0	0	0	0	0	0
0189	vsearch	0	1	0	0	1	0	0	0	0	0	0	0	0	0	1	0	0
0189	unoise	0	1	0	0	1	0	0	0	0	0	0	0	0	0	1	0	0
0190	morphological	1	1	0	0	1	0	0	0	0	0	0	0	0	0	1	0	0
0190	vsearch	0	1	0	0	1	0	0	0	0	0	0	0	0	0	0	0	0
0190	unoise	0	1	0	0	1	0	0	0	0	0	0	0	0	0	0	0	0
0191	morphological	1	0	0	0	0	0	0	0	0	0	0	1	0	0	1	0	0
0191	vsearch	0	1	0	0	1	0	0	0	0	0	0	1	0	0	1	0	0
0191	unoise	0	1	0	0	1	0	0	0	0	0	0	1	0	0	1	0	0
0192	morphological	1	0	0	0	0	0	0	0	1	0	0	0	0	0	0	0	0
0192	vsearch	0	0	0	0	0	0	0	0	1	0	0	0	0	0	0	0	0
0192	unoise	0	0	0	0	0	0	0	0	1	0	0	0	0	0	0	0	0
0193	morphological	0	0	0	0	0	0	0	0	0	0	0	0	0	0	0	0	0
0193	vsearch	0	0	0	0	0	0	0	0	0	0	0	0	0	0	1	0	0
0193	unoise	0	0	0	0	0	0	0	0	0	0	0	0	0	0	1	0	0
0194	morphological	1	0	0	0	0	0	0	0	0	0	1	0	0	0	0	0	0
0194	vsearch	0	0	0	0	0	0	0	0	0	0	0	0	0	0	0	0	0
0194	unoise	1	0	0	0	0	0	0	0	0	0	0	0	0	0	0	0	0
0195	morphological	1	0	0	0	0	0	0	0	0	0	1	0	0	0	0	0	0
0195	vsearch	0	0	0	0	0	0	0	0	1	0	0	0	0	0	1	0	0
0195	unoise	0	0	0	0	0	0	0	0	1	0	0	0	0	0	1	0	0

## Sheet: eDNA
Data on the eDNA samples.
Method refers to molecular detection of aquatic or sediment samples (vsearch and unoise) or morphological identifications of larvae from the corresponding dippping samples.
Volume is indicated in milliliters
IonCode	method	waterbody	volume	subsamples	Culex	Aedes	Deinocerites	Toxorhynchites	Aedes_aegypti	Aedes_albopictus	Aedes_busckii	Aedes_taeniorhynchus	Anopheles_albimanus	Culex_bahamensis	Culex_bidens	Culex_bisulcatus	Culex_nigripalpus	Culex_pipiens_molestus	Culex_pipiens_pallens	Culex_quinquefasciatus	Culex_renatoi	Deinocerites_magnus
0201	morphological	well	100	1	0	0	0	0	0	0	0	0	0	0	0	0	0	0	0	0	0	0
0201	vsearch	well	100	1	0	0	0	0	0	0	0	0	0	0	0	0	0	0	0	0	0	0
0201	unoise	well	100	1	0	0	0	0	0	0	0	0	0	0	0	0	0	0	0	0	0	0
0202	morphological	pond	0	NA	0	0	0	0	0	0	0	0	0	0	0	0	0	0	0	0	0	0
0202	vsearch	pond	0	NA	0	0	0	0	0	0	0	0	0	0	0	0	0	0	0	0	0	0
0202	unoise	pond	0	NA	0	0	0	0	0	0	0	0	0	0	0	0	0	0	0	0	0	0
0203	morphological	lake	70	4	0	0	0	0	0	0	0	0	0	0	0	0	0	0	0	0	0	0
0203	vsearch	lake	70	4	0	0	0	0	0	0	0	0	0	0	0	0	0	0	0	0	0	0
0203	unoise	lake	70	4	0	0	0	0	0	0	0	0	0	0	0	0	0	0	0	0	0	0
0204	morphological	pond	80	12	0	0	0	0	0	0	0	0	0	0	0	0	0	0	0	0	0	0
0204	vsearch	pond	80	12	0	0	0	0	0	0	0	0	0	0	0	0	0	0	0	0	0	0
0204	unoise	pond	80	12	0	0	0	0	0	0	0	0	0	0	0	0	0	0	0	0	0	0
0205	morphological	plant container	10	1	0	0	0	0	0	0	0	0	0	0	0	0	0	0	0	0	0	0
0205	vsearch	plant container	10	1	1	0	0	0	0	0	0	0	0	0	0	0	0	0	0	1	0	0
0205	unoise	plant container	10	1	1	0	0	0	0	0	0	0	0	0	0	0	0	0	0	1	0	0
0206	morphological	plant container	12	1	0	0	0	0	0	0	0	0	0	0	0	0	0	0	0	0	0	0
0206	vsearch	plant container	12	1	1	0	0	0	0	0	0	0	0	0	0	0	0	0	0	1	0	0
0206	unoise	plant container	12	1	1	0	0	0	0	0	0	0	0	0	0	0	0	0	0	1	0	0
0207	morphological	plant container	15	1	0	0	0	0	0	0	0	0	0	0	0	0	0	0	0	0	0	0
0207	vsearch	plant container	15	1	0	0	0	0	0	0	0	0	0	0	0	0	0	0	0	0	0	0
0207	unoise	plant container	15	1	0	0	0	0	0	0	0	0	0	0	0	0	0	0	0	0	0	0
0208	morphological	pond	100	4	0	0	0	0	0	0	0	0	0	0	0	0	0	0	0	0	0	0
0208	vsearch	pond	100	4	0	0	0	0	0	0	0	0	0	0	0	0	0	0	0	0	0	0
0208	unoise	pond	100	4	0	0	0	0	0	0	0	0	0	0	0	0	0	0	0	0	0	0
0209	morphological	pond	60	8	0	0	0	0	0	0	0	0	0	0	0	0	0	0	0	0	0	0
0209	vsearch	pond	60	8	0	0	0	0	0	0	0	0	0	0	0	0	0	0	0	0	0	0
0209	unoise	pond	60	8	0	0	0	0	0	0	0	0	0	0	0	0	0	0	0	0	0	0
0210	morphological	pond	40	8	0	0	0	0	0	0	0	0	0	0	0	0	0	0	0	0	0	0
0210	vsearch	pond	40	8	1	0	0	0	0	0	0	0	0	0	0	0	0	0	0	1	0	0
0210	unoise	pond	40	8	1	0	0	0	0	0	0	0	0	0	0	0	0	0	0	1	0	0
0211	morphological	plant container	0	NA	1	0	0	0	0	0	0	0	0	0	0	1	0	0	0	0	0	0
0211	vsearch	plant container	0	NA	0	0	0	0	0	0	0	0	0	0	0	0	0	0	0	0	0	0
0211	unoise	plant container	0	NA	0	0	0	0	0	0	0	0	0	0	0	0	0	0	0	0	0	0
0212	morphological	artificial container	50	1	1	0	0	0	0	0	0	0	0	0	0	0	0	0	0	1	0	0
0212	vsearch	artificial container	50	1	1	0	0	0	1	0	0	0	0	0	0	0	0	0	0	1	1	0
0212	unoise	artificial container	50	1	1	0	0	0	0	0	0	0	0	0	0	0	0	0	0	1	1	0
0213	morphological	artificial container	50	1	0	0	0	0	0	0	0	0	0	0	0	0	0	0	0	0	0	0
0213	vsearch	artificial container	50	1	1	0	0	0	1	0	0	0	0	0	0	0	0	0	0	1	1	0
0213	unoise	artificial container	50	1	1	0	0	0	0	0	0	0	0	0	0	0	0	0	0	1	1	0
0214	morphological	well	100	1	0	0	0	0	0	0	0	0	0	0	0	0	0	0	0	0	0	0
0214	vsearch	well	100	1	1	0	0	0	0	0	0	0	0	0	0	0	0	0	0	1	0	0
0214	unoise	well	100	1	1	0	0	0	0	0	0	0	0	0	0	0	0	0	0	1	0	0
0215	morphological	well	100	1	0	0	0	0	0	0	0	0	0	0	0	0	0	0	0	0	0	0
0215	vsearch	well	100	1	1	0	0	0	0	0	0	0	0	0	0	0	0	0	0	1	1	0
0215	unoise	well	100	1	1	0	0	0	0	0	0	0	0	0	0	0	0	0	0	1	1	0
0216	morphological	cistern	100	NA	0	0	0	0	0	0	0	0	0	0	0	0	0	0	0	0	0	0
0216	vsearch	cistern	100	NA	0	0	0	0	0	0	0	0	0	0	0	0	0	0	0	0	0	0
0216	unoise	cistern	100	NA	0	0	0	0	0	0	0	0	0	0	0	0	0	0	0	0	0	0
0217	morphological		100	NA	0	0	0	0	0	0	0	0	0	0	0	0	0	0	0	0	0	0
0217	vsearch		101	NA	1	0	0	0	0	0	0	0	0	1	0	0	0	0	0	1	0	0
0217	unoise		102	NA	1	0	0	0	0	0	0	0	0	1	0	0	0	0	0	1	0	0
0218	morphological	well	100	NA	0	0	0	0	0	0	0	0	0	0	0	0	0	0	0	0	0	0
0218	vsearch	well	101	NA	1	0	0	0	1	0	0	0	0	1	0	0	0	1	0	1	1	0
0218	unoise	well	102	NA	1	0	0	0	0	0	0	0	0	1	0	0	0	0	0	1	1	0
0219	morphological	artificial container	100	NA	0	0	0	0	0	0	0	0	0	0	0	0	0	0	0	0	0	0
0219	vsearch	artificial container	101	NA	1	0	0	0	0	0	0	0	0	0	0	0	0	0	0	1	0	0
0219	unoise	artificial container	102	NA	1	0	0	0	0	0	0	0	0	0	0	0	0	0	0	1	0	0
0220	morphological	cistern	100	1	0	0	0	0	0	0	0	0	0	0	0	0	0	0	0	0	0	0
0220	vsearch	cistern	100	1	1	0	0	0	0	0	0	0	0	0	0	0	0	0	0	1	0	0
0220	unoise	cistern	100	1	1	0	0	0	0	0	0	0	0	0	0	0	0	0	0	1	0	0
0221	morphological	treehole	5	1	0	0	0	0	0	0	0	0	0	0	0	0	0	0	0	0	0	0
0221	vsearch	treehole	5	1	1	0	0	0	0	0	0	0	0	0	0	0	0	0	0	1	0	0
0221	unoise	treehole	5	1	1	0	0	0	0	0	0	0	0	0	0	0	0	0	0	1	0	0
0222	morphological	treehole	5	1	0	0	0	0	0	0	0	0	0	0	0	0	0	0	0	0	0	0
0222	vsearch	treehole	5	1	1	0	0	0	0	0	0	0	0	0	0	0	0	0	0	1	0	0
0222	unoise	treehole	5	1	1	0	0	0	0	0	0	0	0	0	0	0	0	0	0	1	0	0
0223	morphological	plant container	8	1	0	0	0	0	0	0	0	0	0	0	0	0	0	0	0	0	0	0
0223	vsearch	plant container	8	1	0	0	0	0	0	0	0	0	0	0	0	0	0	0	0	0	0	0
0223	unoise	plant container	8	1	0	0	0	0	0	0	0	0	0	0	0	0	0	0	0	0	0	0
0224	morphological	plant container	70	1	0	0	0	0	0	0	0	0	0	0	0	0	0	0	0	0	0	0
0224	vsearch	plant container	70	1	0	0	0	0	0	0	0	0	0	0	0	0	0	0	0	0	0	0
0224	unoise	plant container	70	1	0	0	0	0	0	0	0	0	0	0	0	0	0	0	0	0	0	0
0225	morphological	treehole	3	1	0	0	0	0	0	0	0	0	0	0	0	0	0	0	0	0	0	0
0225	vsearch	treehole	3	1	0	0	0	0	0	0	0	0	0	0	0	0	0	0	0	0	0	0
0225	unoise	treehole	3	1	0	0	0	0	0	0	0	0	0	0	0	0	0	0	0	0	0	0
0226	morphological	treehole	100	1	0	0	0	0	0	0	0	0	0	0	0	0	0	0	0	0	0	0
0226	vsearch	treehole	100	1	1	0	0	0	0	0	0	0	0	0	0	0	0	0	0	1	0	0
0226	unoise	treehole	100	1	1	0	0	0	0	0	0	0	0	0	0	0	0	0	0	1	0	0
0227	morphological	treehole	16	1	0	0	0	0	0	0	0	0	0	0	0	0	0	0	0	0	0	0
0227	vsearch	treehole	16	1	1	0	0	0	0	0	0	0	0	0	0	0	0	0	0	1	0	0
0227	unoise	treehole	16	1	1	0	0	0	0	0	0	0	0	0	0	0	0	0	0	1	0	0
0228	morphological	treehole	9	1	0	0	0	0	0	0	0	0	0	0	0	0	0	0	0	0	0	0
0228	vsearch	treehole	9	1	0	0	0	0	0	0	0	0	0	0	0	0	0	0	0	0	0	0
0228	unoise	treehole	9	1	0	0	0	0	0	0	0	0	0	0	0	0	0	0	0	0	0	0
0229	morphological	treehole	31	1	0	0	0	0	0	0	0	0	0	0	0	0	0	0	0	0	0	0
0229	vsearch	treehole	31	1	0	0	0	0	0	0	0	0	0	0	0	0	0	0	0	0	0	0
0229	unoise	treehole	31	1	0	0	0	0	0	0	0	0	0	0	0	0	0	0	0	0	0	0
0230	morphological	sink	45	1	0	0	0	0	0	0	0	0	0	0	0	0	0	0	0	0	0	0
0230	vsearch	sink	45	1	0	0	0	0	1	0	0	0	0	0	0	0	0	0	0	0	0	0
0230	unoise	sink	45	1	0	1	0	0	1	0	0	0	0	0	0	0	0	0	0	0	0	0
0231	morphological	artificial container	100	6	1	1	0	0	1	0	0	0	0	0	0	0	0	0	0	1	0	0
0231	vsearch	artificial container	100	6	1	0	0	0	0	0	0	0	0	0	0	0	0	0	0	1	0	0
0231	unoise	artificial container	100	6	1	0	0	0	0	0	0	0	0	0	0	0	0	0	0	1	0	0
0232	morphological	artificial container	100	1	0	0	0	0	0	0	0	0	0	0	0	0	0	0	0	0	0	0
0232	vsearch	artificial container	100	1	0	0	0	0	0	0	0	0	0	0	0	0	0	0	0	0	0	0
0232	unoise	artificial container	100	1	0	0	0	0	0	0	0	0	0	0	0	0	0	0	0	0	0	0
0233	morphological	plant container	200	4	0	0	0	0	0	0	0	0	0	0	0	0	0	0	0	0	0	0
0233	vsearch	plant container	200	4	1	0	0	0	0	0	0	0	0	0	0	0	0	0	0	1	0	0
0233	unoise	plant container	200	4	1	0	0	0	0	0	0	0	0	0	0	0	0	0	0	1	0	0
0234	morphological	ditch	100	8	0	0	0	0	0	0	0	0	0	0	0	0	0	0	0	0	0	0
0234	vsearch	ditch	100	8	0	0	0	0	0	0	0	0	0	0	0	0	0	0	0	0	0	0
0234	unoise	ditch	100	8	0	0	0	0	0	0	0	0	0	0	0	0	0	0	0	0	0	0
0235	morphological	ditch	200	2	0	0	0	0	0	0	0	0	0	0	0	0	0	0	0	0	0	0
0235	vsearch	ditch	200	2	0	0	0	0	0	0	0	0	0	0	0	0	0	0	0	0	0	0
0235	unoise	ditch	200	2	0	0	0	0	0	0	0	0	0	0	0	0	0	0	0	0	0	0
0236	morphological	pond	200	10	0	0	0	0	0	0	0	0	0	0	0	0	0	0	0	0	0	0
0236	vsearch	pond	200	10	0	0	0	0	0	0	0	0	0	0	0	0	0	0	0	0	0	0
0236	unoise	pond	200	10	0	0	0	0	0	0	0	0	0	0	0	0	0	0	0	0	0	0
0237	morphological	pond	80	8	0	0	0	0	0	0	0	0	0	0	0	0	0	0	0	0	0	0
0237	vsearch	pond	80	8	1	0	0	0	0	0	0	0	0	0	0	0	0	0	0	1	0	0
0237	unoise	pond	80	8	1	0	0	0	0	0	0	0	0	0	0	0	0	0	0	1	0	0
0238	morphological	ditch	160	8	0	0	0	0	0	0	0	0	0	0	0	0	0	0	0	0	0	0
0238	vsearch	ditch	160	8	0	0	0	0	0	0	0	0	0	0	0	0	0	0	0	0	0	0
0238	unoise	ditch	160	8	0	0	0	0	0	0	0	0	0	0	0	0	0	0	0	0	0	0
0239	morphological	cistern	200	4	0	0	0	0	0	0	0	0	0	0	0	0	0	0	0	0	0	0
0239	vsearch	cistern	200	4	0	0	0	0	0	0	0	0	0	0	0	0	0	0	0	0	0	0
0239	unoise	cistern	200	4	0	0	0	0	0	0	0	0	0	0	0	0	0	0	0	0	0	0
0240	morphological	pond	160	1	0	0	0	0	0	0	0	0	0	0	0	0	0	0	0	0	0	0
0240	vsearch	pond	160	1	0	0	0	0	0	0	0	0	0	0	0	0	0	0	0	0	0	0
0240	unoise	pond	160	1	0	0	0	0	0	0	0	0	0	0	0	0	0	0	0	0	0	0
0241	morphological	ditch	160	5	0	0	0	0	0	0	0	0	0	0	0	0	0	0	0	0	0	0
0241	vsearch	ditch	160	5	0	0	0	0	0	0	0	0	0	0	0	0	0	0	0	0	0	0
0241	unoise	ditch	160	5	0	0	0	0	0	0	0	0	0	0	0	0	0	0	0	0	0	0
0242	morphological	sink	200	1	0	0	0	0	0	0	0	0	0	0	0	0	0	0	0	0	0	0
0242	vsearch	sink	200	1	0	0	0	0	0	0	0	0	0	0	0	0	0	0	0	0	0	0
0242	unoise	sink	200	1	0	0	0	0	0	0	0	0	0	0	0	0	0	0	0	0	0	0
0243	morphological	rockpool	200	3	1	0	0	0	0	0	0	0	0	1	0	0	0	0	0	0	0	0
0243	vsearch	rockpool	200	3	0	0	0	0	0	0	0	0	0	0	0	0	0	0	0	0	0	0
0243	unoise	rockpool	200	3	0	0	0	0	0	0	0	0	0	0	0	0	0	0	0	0	0	0
0244	morphological	pond	13	1	0	0	0	0	0	0	0	0	0	0	0	0	0	0	0	0	0	0
0244	vsearch	pond	13	1	0	0	0	0	0	0	0	0	0	0	0	0	0	0	0	0	0	0
0244	unoise	pond	13	1	0	0	0	0	0	0	0	0	0	0	0	0	0	0	0	0	0	0
0245	morphological	artificial container	150	1	1	1	0	0	1	0	0	0	0	0	0	0	0	0	0	1	0	0
0245	vsearch	artificial container	150	1	1	0	0	0	0	0	0	0	0	0	0	0	0	0	0	1	0	0
0245	unoise	artificial container	150	1	1	0	0	0	0	0	0	0	0	0	0	0	0	0	0	1	0	0
0246	morphological	ditch	170	3	0	0	0	0	0	0	0	0	0	0	0	0	0	0	0	0	0	0
0246	vsearch	ditch	170	3	0	0	0	0	0	0	0	0	0	0	0	0	0	0	0	0	0	0
0246	unoise	ditch	170	3	0	0	0	0	0	0	0	0	0	0	0	0	0	0	0	0	0	0
0247	morphological	pond	60	1	0	0	0	0	0	0	0	0	0	0	0	0	0	0	0	0	0	0
0247	vsearch	pond	60	1	0	0	0	0	0	0	0	0	0	0	0	0	0	0	0	0	0	0
0247	unoise	pond	60	1	0	0	0	0	0	0	0	0	0	0	0	0	0	0	0	0	0	0
0248	morphological	plant container	60	10	0	0	0	0	0	0	0	0	0	0	0	0	0	0	0	0	0	0
0248	vsearch	plant container	60	10	0	0	0	0	0	0	0	0	0	0	0	0	0	0	0	0	0	0
0248	unoise	plant container	60	10	0	0	0	0	0	0	0	0	0	0	0	0	0	0	0	0	0	0
0249	morphological	plant container	100	20	0	0	0	0	0	0	0	0	0	0	0	0	0	0	0	0	0	0
0249	vsearch	plant container	100	20	0	0	0	0	0	0	0	0	0	0	0	0	0	0	0	0	0	0
0249	unoise	plant container	100	20	0	0	0	0	0	0	0	0	0	0	0	0	0	0	0	0	0	0
0250	morphological	artificial container	140	NA	0	0	0	0	0	0	0	0	0	0	0	0	0	0	0	0	0	0
0250	vsearch	artificial container	140	NA	0	0	0	0	0	0	0	0	0	0	0	0	0	0	0	0	0	0
0250	unoise	artificial container	140	NA	0	0	0	0	0	0	0	0	0	0	0	0	0	0	0	0	0	0
0251	morphological	treehole	40	1	0	0	0	0	0	0	0	0	0	0	0	0	0	0	0	0	0	0
0251	vsearch	treehole	40	1	0	0	0	0	0	0	0	0	0	0	0	0	0	0	0	0	0	0
0251	unoise	treehole	40	1	0	0	0	0	0	0	0	0	0	0	0	0	0	0	0	0	0	0
0252	morphological	pond	200	9	0	0	0	0	0	0	0	0	0	0	0	0	0	0	0	0	0	0
0252	vsearch	pond	200	9	0	0	0	0	0	0	0	0	0	0	0	0	0	0	0	0	0	0
0252	unoise	pond	200	9	0	0	0	0	0	0	0	0	0	0	0	0	0	0	0	0	0	0
0253	morphological	pond	200	9	0	0	0	0	0	0	0	0	0	0	0	0	0	0	0	0	0	0
0253	vsearch	pond	200	9	0	0	0	0	0	0	0	0	0	0	0	0	0	0	0	0	0	0
0253	unoise	pond	200	9	0	0	0	0	0	0	0	0	0	0	0	0	0	0	0	0	0	0
0254	morphological	cistern	200	NA	0	0	0	0	0	0	0	0	0	0	0	0	0	0	0	0	0	0
0254	vsearch	cistern	200	NA	0	0	0	0	0	0	0	0	0	0	0	0	0	0	0	0	0	0
0254	unoise	cistern	200	NA	0	0	0	0	0	0	0	0	0	0	0	0	0	0	0	0	0	0
0255	morphological	artificial container	200	1	0	0	0	0	0	0	0	0	0	0	0	0	0	0	0	0	0	0
0255	vsearch	artificial container	200	1	0	0	0	0	0	0	0	0	0	0	0	0	0	0	0	0	0	0
0255	unoise	artificial container	200	1	0	0	0	0	0	0	0	0	0	0	0	0	0	0	0	0	0	0
0256	morphological	cistern	200	6	0	0	0	0	0	0	0	0	0	0	0	0	0	0	0	0	0	0
0256	vsearch	cistern	200	6	0	0	0	0	0	0	0	0	0	0	0	0	0	0	0	0	0	0
0256	unoise	cistern	200	6	0	0	0	0	0	0	0	0	0	0	0	0	0	0	0	0	0	0
0257	morphological	plant container	30	9	0	1	0	0	0	0	1	0	0	0	0	0	0	0	0	0	0	0
0257	vsearch	plant container	30	9	0	0	0	0	0	0	0	0	0	0	0	0	0	0	0	0	0	0
0257	unoise	plant container	30	9	0	0	0	0	0	0	0	0	0	0	0	0	0	0	0	0	0	0
0258	morphological	plant container	200	3	1	0	0	0	0	0	0	0	0	0	0	1	0	0	0	0	0	0
0258	vsearch	plant container	200	3	1	0	0	0	0	0	0	0	0	0	0	1	0	0	0	0	0	0
0258	unoise	plant container	200	3	1	0	0	1	0	0	0	0	0	0	0	0	0	0	0	0	0	0
0259	morphological	plant container	170	12	1	0	0	0	0	0	0	0	0	0	0	1	0	0	0	0	0	0
0259	vsearch	plant container	170	12	0	0	0	0	0	0	0	0	0	0	0	0	0	0	0	0	0	0
0259	unoise	plant container	170	12	0	0	0	0	0	0	0	0	0	0	0	0	0	0	0	0	0	0
0260	morphological	artificial container	40	1	0	0	0	0	0	0	0	0	0	0	0	0	0	0	0	0	0	0
0260	vsearch	artificial container	40	1	1	0	0	0	1	0	0	0	0	0	0	0	0	0	0	1	0	0
0260	unoise	artificial container	40	1	1	1	0	0	1	0	0	0	0	0	0	0	0	0	0	1	0	0
0261	morphological	pond	200	NA	0	0	0	0	0	0	0	0	0	0	0	0	0	0	0	0	0	0
0261	vsearch	pond	201	NA	1	0	0	0	1	0	0	0	0	0	0	0	0	0	0	1	0	0
0261	unoise	pond	202	NA	1	1	0	0	1	0	0	0	0	0	0	0	0	0	0	1	0	0
0262	morphological	plant container	100	6	1	0	0	0	0	0	0	0	0	0	0	1	0	0	0	0	0	0
0262	vsearch	plant container	100	6	1	0	0	0	0	0	0	0	0	0	0	0	0	0	0	0	0	0
0262	unoise	plant container	100	6	1	0	0	0	0	0	0	0	0	0	0	0	0	0	0	0	0	0
0263	morphological	treehole	70	1	1	0	0	0	0	0	0	0	0	0	0	1	0	0	0	0	0	0
0263	vsearch	treehole	70	1	0	0	0	0	0	0	0	0	0	0	0	0	0	0	0	0	0	0
0264	unoise	treehole	70	1	1	0	0	0	0	0	0	0	0	0	0	0	0	0	0	0	0	0
0264	morphological	cistern	220	8	0	0	0	0	0	0	0	0	0	0	0	0	0	0	0	0	0	0
0264	vsearch	cistern	220	8	0	0	0	0	0	0	0	0	0	0	0	0	0	0	0	0	0	0
0264	unoise	cistern	220	8	0	0	0	0	0	0	0	0	0	0	0	0	0	0	0	0	0	0
0265	morphological	artificial container	10	1	0	0	0	0	0	0	0	0	0	0	0	0	0	0	0	0	0	0
0265	vsearch	artificial container	10	1	1	0	0	0	0	0	0	0	0	0	0	0	0	0	0	1	0	0
0265	unoise	artificial container	10	1	1	0	0	0	0	0	0	0	0	0	0	0	0	0	0	1	0	0
0266	morphological	cistern	200	1	0	0	0	0	0	0	0	0	0	0	0	0	0	0	0	0	0	0
0266	vsearch	cistern	200	1	0	0	0	0	0	0	0	0	0	0	0	0	0	0	0	0	0	0
0266	unoise	cistern	200	1	0	0	0	0	0	0	0	0	0	0	0	0	0	0	0	0	0	0
0267	morphological	cistern	200	1	0	0	0	0	0	0	0	0	0	0	0	0	0	0	0	0	0	0
0267	vsearch	cistern	200	1	1	0	0	0	1	0	0	0	0	0	0	0	0	0	1	1	0	0
0267	unoise	cistern	200	1	1	0	0	0	0	0	0	0	0	0	0	0	0	0	0	1	0	0
0268	morphological	artificial container	200	2	0	0	0	0	0	0	0	0	0	0	0	0	0	0	0	0	0	0
0268	vsearch	artificial container	200	2	0	0	0	0	0	0	0	0	0	0	0	0	0	0	0	0	0	0
0268	unoise	artificial container	200	2	0	0	0	0	0	0	0	0	0	0	0	0	0	0	0	0	0	0
0269	morphological	plant container	NA	NA	0	0	0	0	0	0	0	0	0	0	0	0	0	0	0	0	0	0
0269	vsearch	plant container	NA	NA	0	0	0	0	0	0	0	0	0	0	0	0	0	0	0	0	0	0
0269	unoise	plant container	NA	NA	1	0	0	0	0	0	0	0	0	0	0	0	0	0	0	0	0	0
0270	morphological	plant container	NA	NA	0	0	0	0	0	0	0	0	0	0	0	0	0	0	0	0	0	0
0270	vsearch	plant container	NA	NA	1	0	0	0	0	0	0	0	0	0	0	0	0	0	0	0	0	0
0270	unoise	plant container	NA	NA	1	0	0	0	0	0	0	0	0	0	0	0	0	0	0	0	0	0
0271	morphological	pond	NA	NA	0	0	0	0	0	0	0	0	0	0	0	0	0	0	0	0	0	0
0271	vsearch	pond	NA	NA	0	0	0	0	0	0	0	0	0	0	0	0	0	0	0	0	0	0
0271	unoise	pond	NA	NA	0	0	0	0	0	0	0	0	0	0	0	0	0	0	0	0	0	0
0272	morphological	ditch	NA	NA	0	0	0	0	0	0	0	0	0	0	0	0	0	0	0	0	0	0
0272	vsearch	ditch	NA	NA	0	0	0	0	0	0	0	0	0	0	0	0	0	0	0	0	0	0
0272	unoise	ditch	NA	NA	0	0	0	0	0	0	0	0	0	0	0	0	0	0	0	0	0	0
0273	morphological	artificial container	NA	NA	0	0	0	0	0	0	0	0	0	0	0	0	0	0	0	0	0	0
0273	vsearch	artificial container	NA	NA	0	0	0	0	0	0	0	0	0	0	0	0	0	0	0	0	0	0
0273	unoise	artificial container	NA	NA	0	0	0	0	0	0	0	0	0	0	0	0	0	0	0	0	0	0
0274	morphological	plant container	NA	NA	0	0	0	0	0	0	0	0	0	0	0	0	0	0	0	0	0	0
0274	vsearch	plant container	NA	NA	1	0	0	0	0	0	0	0	0	0	0	0	0	0	0	0	0	0
0274	unoise	plant container	NA	NA	1	0	0	0	0	0	0	0	0	0	0	0	0	0	0	0	0	0
0275	morphological	pond	NA	NA	0	0	0	0	0	0	0	0	0	0	0	0	0	0	0	0	0	0
0275	morphological	pond	NA	NA	0	0	0	0	0	0	0	0	0	0	0	0	0	0	0	0	0	0
0275	morphological	pond	NA	NA	0	0	0	0	0	0	0	0	0	0	0	0	0	0	0	0	0	0
0276	morphological	plant container	NA	NA	0	0	0	0	0	0	0	0	0	0	0	0	0	0	0	0	0	0
0276	vsearch	plant container	NA	NA	0	0	0	0	0	0	0	0	0	0	0	0	0	0	0	0	0	0
0276	unoise	plant container	NA	NA	1	0	0	0	0	0	0	0	0	0	0	0	0	0	0	0	0	0
0277	morphological	ditch	NA	NA	0	0	0	0	0	0	0	0	0	0	0	0	0	0	0	0	0	0
0278	morphological	ditch	NA	NA	0	0	0	0	0	0	0	0	0	0	0	0	0	0	0	0	0	0
